# Supplementary material for: Improvement of the activity of the anti-HIV-1 integrase aptamer T30175 by introducing a modified thymidine into the loops
Source: PubMed Central journal article supplement (PMC5945619; doi:10.1038/s41598-018-25720-1), 2018-05-10
Supplement: 41598_2018_25720_MOESM1_ESM.pdf [file 41598_2018_25720_MOESM1_ESM.pdf]

## SUPPLEMENTARY INFORMATION

### IMPROVEMENT OF THE ACTIVITY OF THE ANTI-HIV-1 INTEGRASE APTAMER T30175 BY INTRODUCING A MODIFIED THYMIDINE INTO THE LOOPS

Antonella Virgilio<sup>1</sup>, Teresa Amato<sup>1</sup>, Luigi Petraccone<sup>2</sup>, Francesca Esposito<sup>3</sup>, Nicole Grandi<sup>3</sup>, Enzo Tramontano<sup>3</sup>, Raquel Romero<sup>4</sup>, Shozeb Haider<sup>4</sup>, Isabel Gomez-Monterrey<sup>1</sup>, Ettore Novellino<sup>1</sup>, Luciano Mayol<sup>1</sup>, Veronica Esposito<sup>1\*</sup> and Aldo Galeone<sup>1\*</sup>

\*corresponding authors: [galeone@unina.it](mailto:galeone@unina.it) (AG); [verespos@unina.it](mailto:verespos@unina.it) (VE).

<sup>1</sup>Department of Pharmacy, University of Naples Federico II, Via D. Montesano 49, I-80131 Naples, Italy.

<sup>2</sup>Department of Chemical Sciences, University of Naples Federico II, Via Cintia, I-80126 Naples, Italy.

<sup>3</sup>Department of Life and Environmental Sciences, University of Cagliari, Cittadella Universitaria di Monserrato, 09045 Monserrato, Italy.

<sup>4</sup>University College London-School of Pharmacy, 29-39 Brunswick Square, London WC1N1AX, U.K.

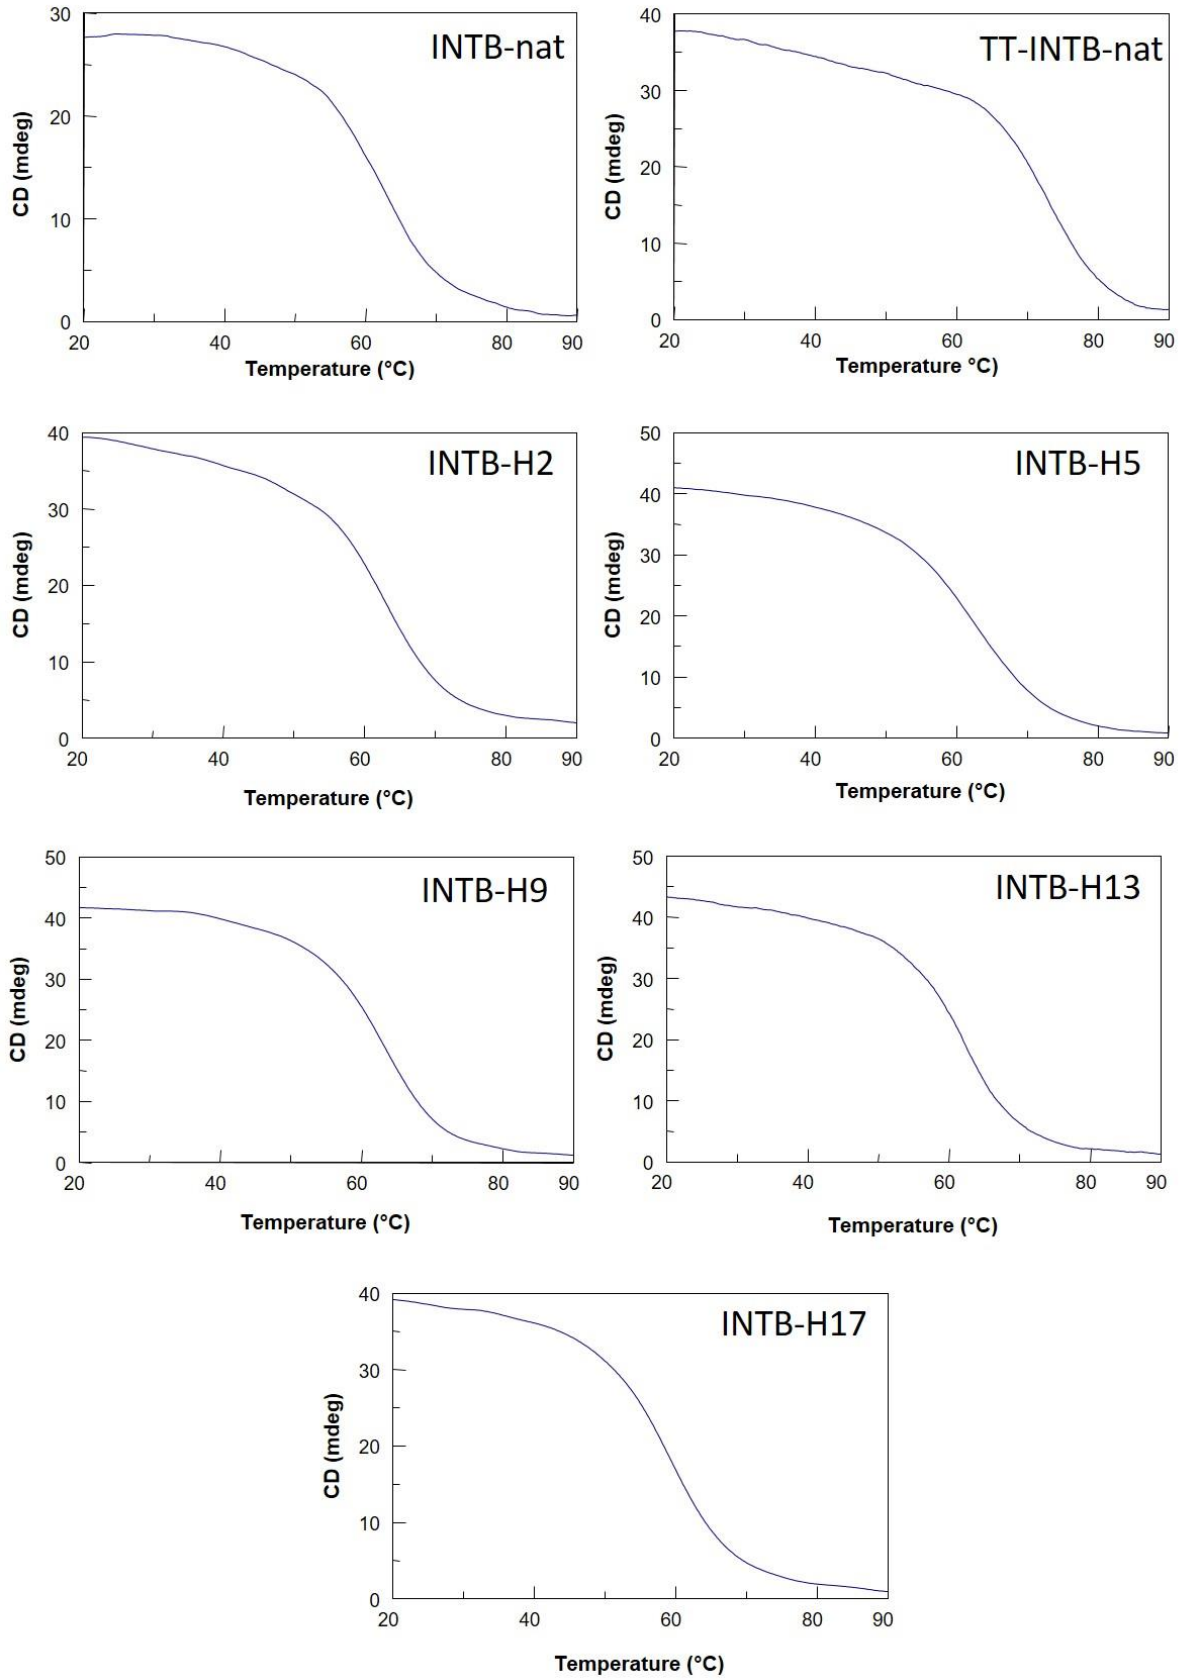

**Figure S1:** CD melting curves of the modified T30175 aptamers investigated and their reference ODNs **INTB-nat** and **TT-INTB-nat**.

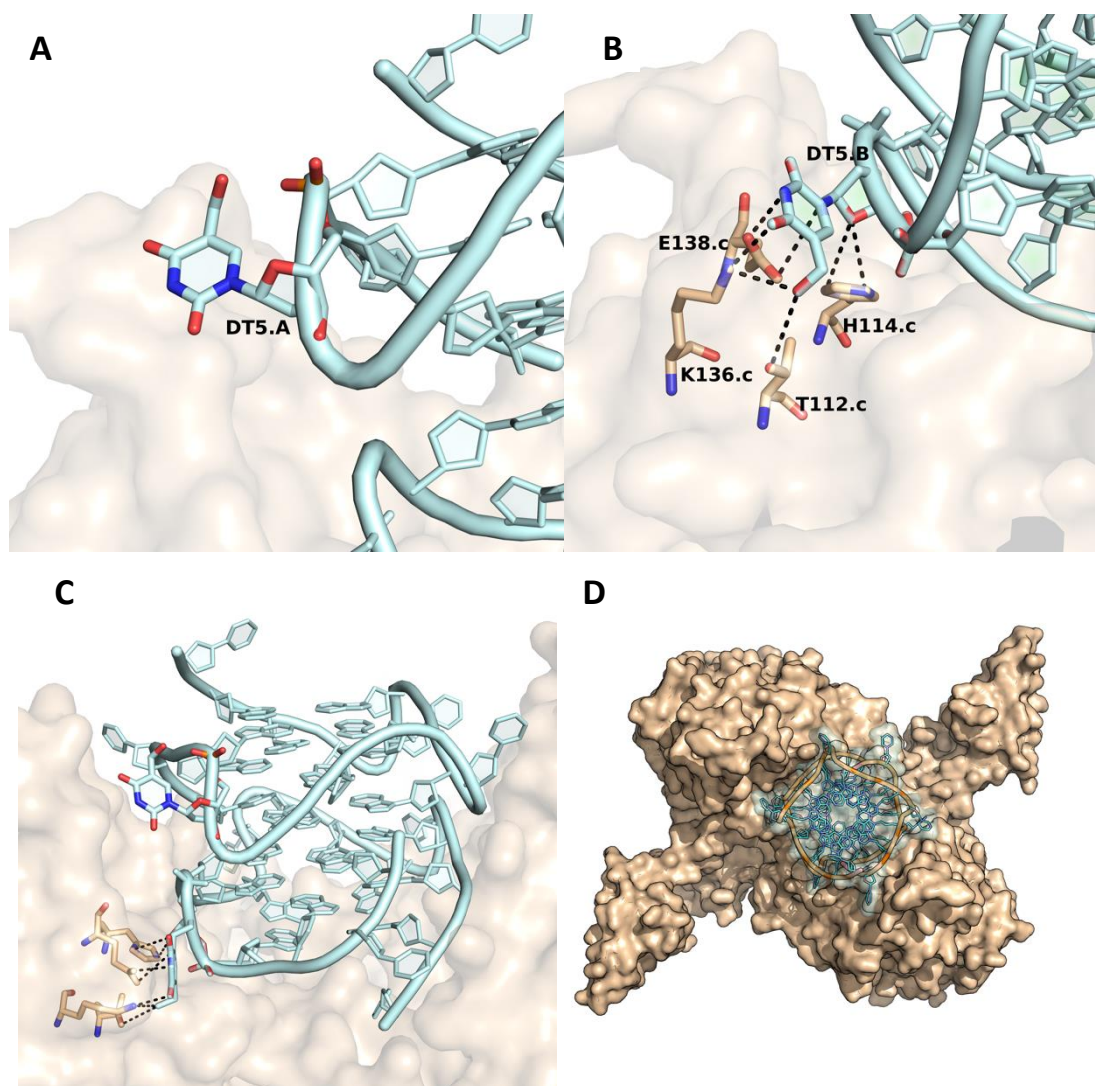

**Figure S2:** (A) Details of the interactions formed by the **H** residue at position 5 in chain A and (B) chain B of the aptamer **INTB-H5**. (C) Side view and (D) top view of the protein-aptamer complex. HIV-1 IN has been coloured beige and represented as a surface, the aptamer **INTB-H5** has been represented as a cartoon and coloured in light cyan.

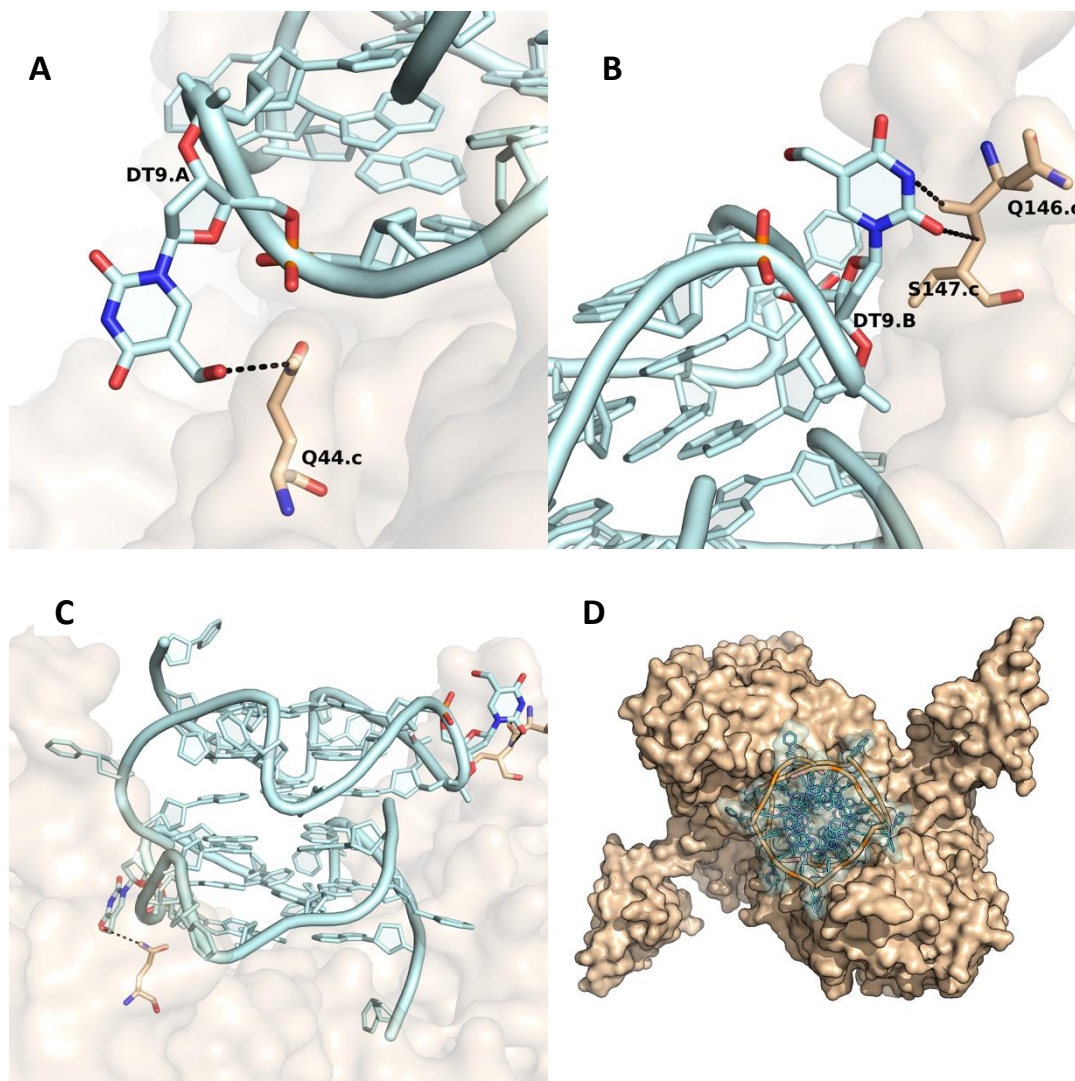

**Figure S3:** (A) Details of the interactions formed by the **H** residue at position 9 in chain A and (B) chain B of the aptamer **INTB-H9**. (C) Side view and (D) top view of the protein-aptamer complex. HIV-1 IN has been coloured beige and represented as a surface, the aptamer **INTB-H9** has been represented as a cartoon and coloured in light cyan.

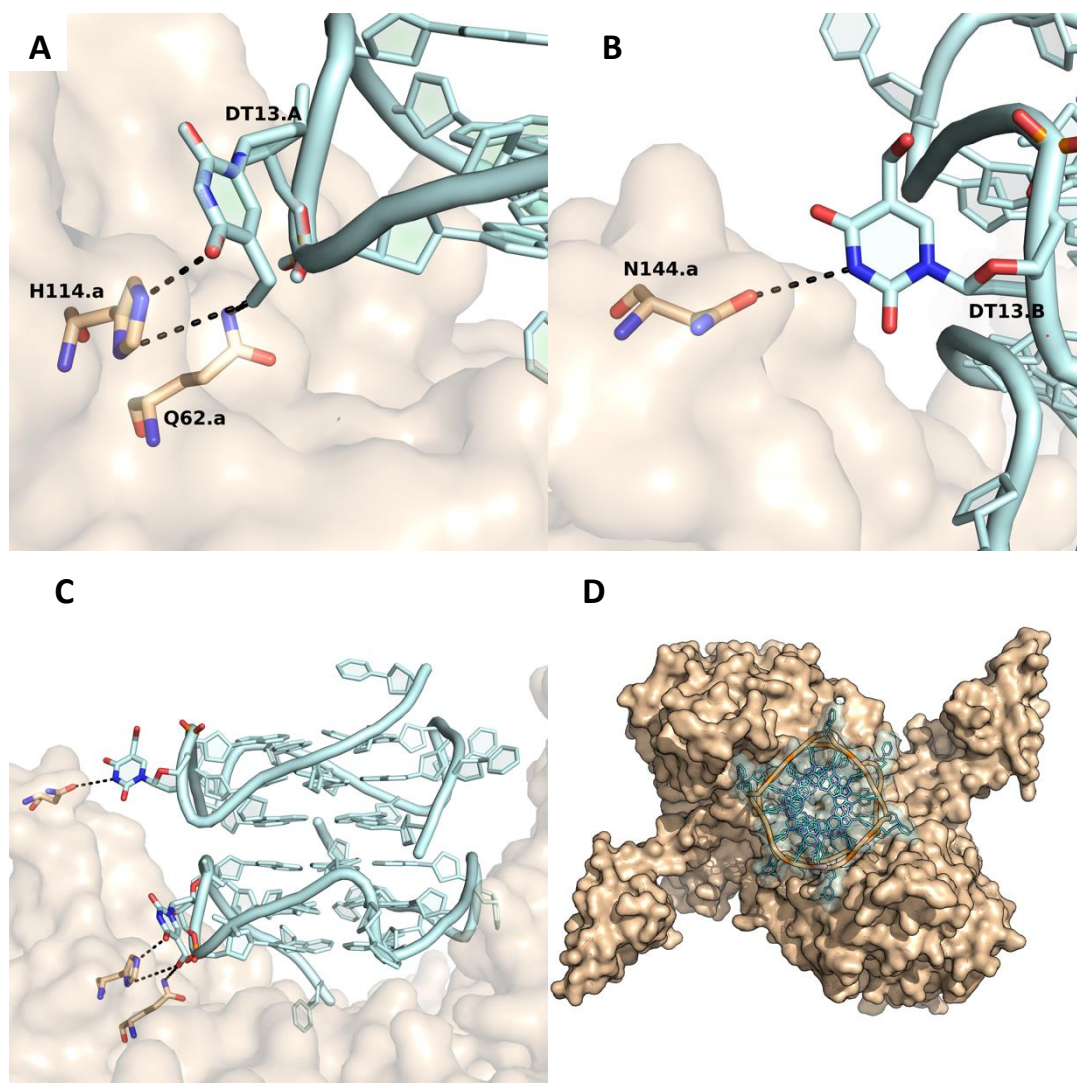

**Figure S4:** (A) Details of the interactions formed by the **H** residue at position 13 in chain A and (B) chain B of the aptamer **INTB-H13**. (C) Side view and (D) top view of the protein-aptamer complex. HIV-1 IN has been coloured beige and represented as a surface, the aptamer **INTB-H13** has been represented as a cartoon and coloured in light cyan.

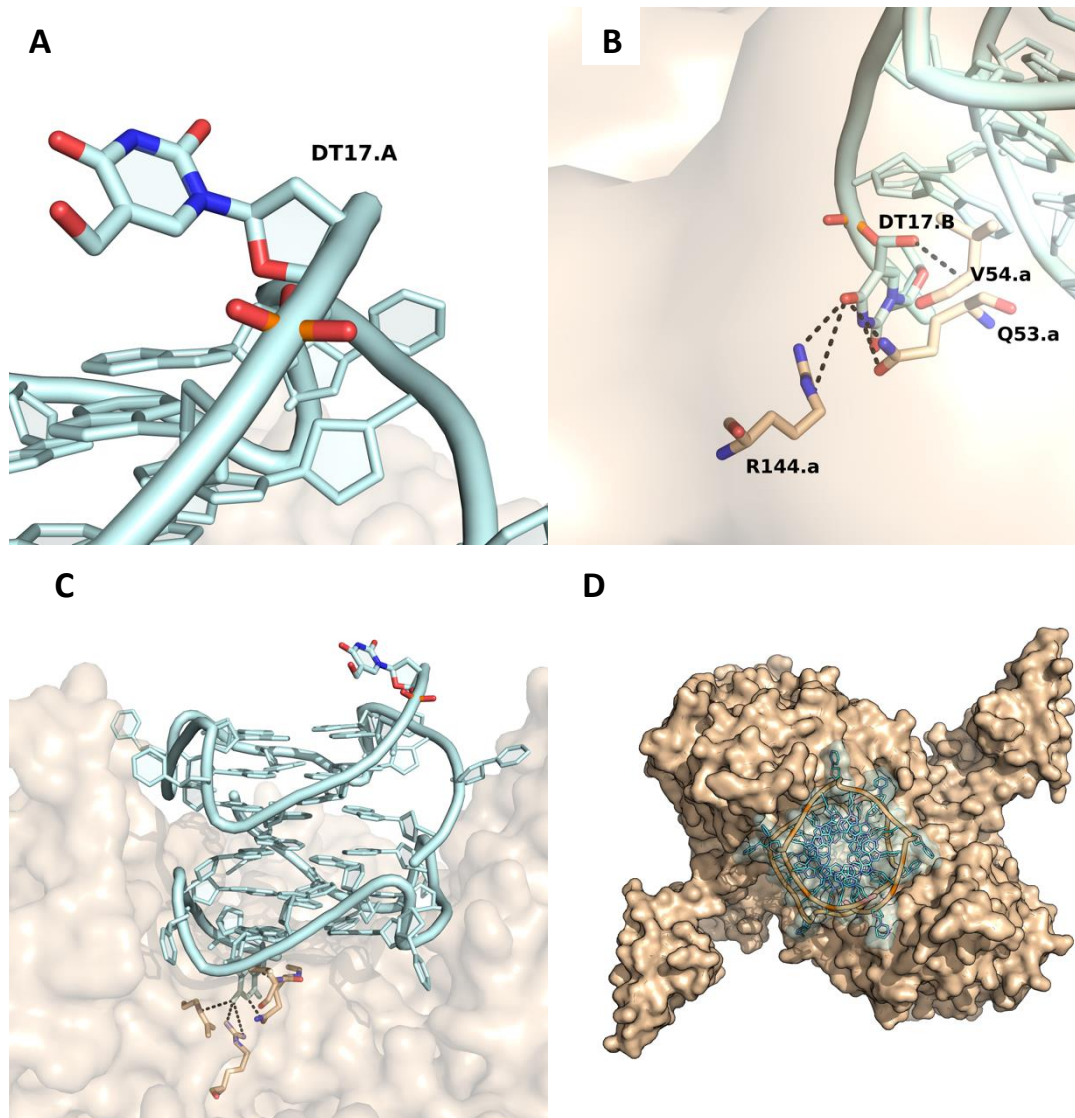

**Figure S5:** (A) Details of the interactions formed by the **H** residue at position 17 in chain A and (B) chain B of the aptamer **INTB-H17**. (C) Side view and (D) top view of the protein-aptamer complex. HIV-1 IN has been coloured beige and represented as a surface, the aptamer **INTB-H17** has been represented as a cartoon and coloured in light cyan.

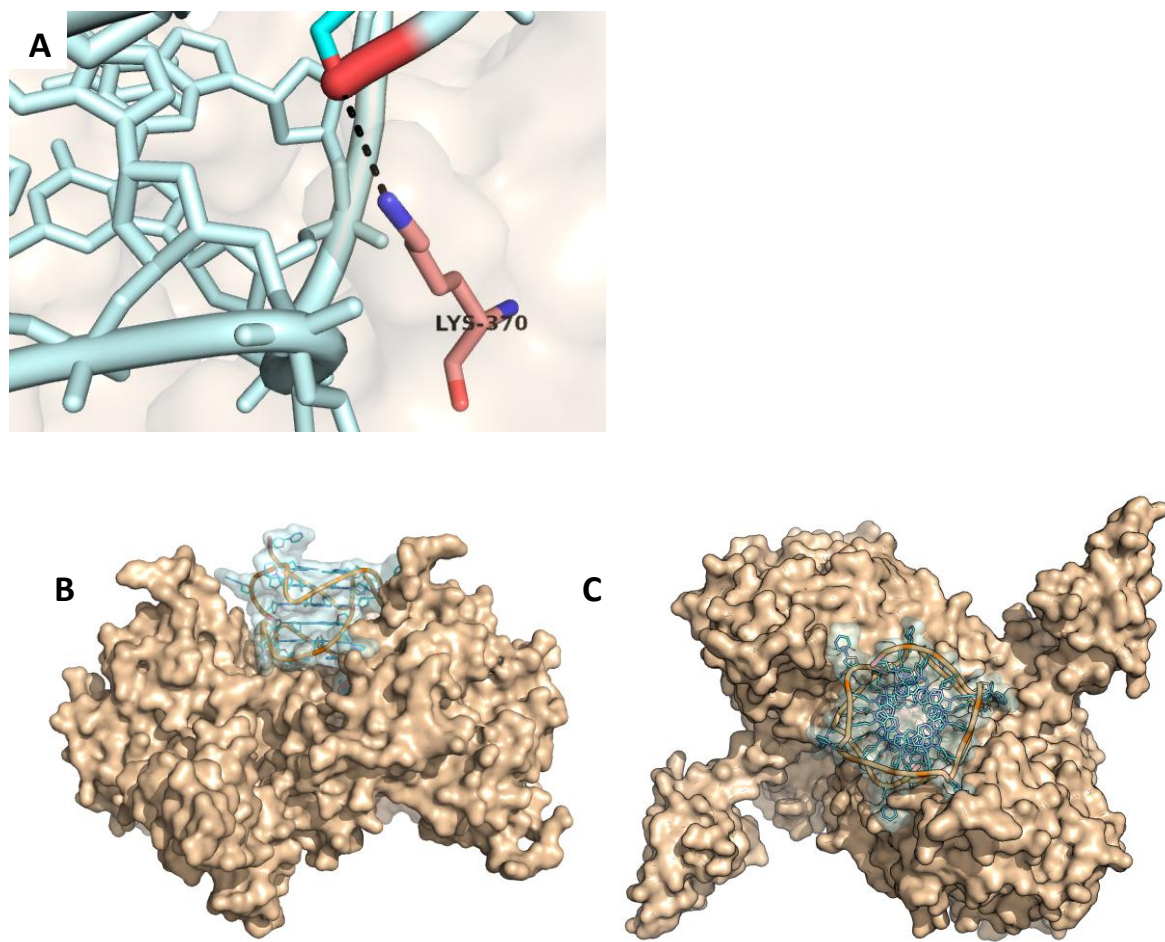

**Figure S6:** (A) Details of the interactions involving chain A of aptamer **INTB-nat** (A). (B) Side view and (C) top view of the protein-aptamer complex. HIV-1 IN has been coloured beige and represented as a surface, the aptamer **INTB-nat** has been represented as a cartoon and coloured in light cyan.

| Sequence          | $\Delta H_{v.H.}$<br>(kJ/mol) <sup>a</sup> | $\Delta H_{v.H.}$<br>(kJ/mol) |
|-------------------|--------------------------------------------|-------------------------------|
|                   | Unfolding model                            |                               |
|                   | $Q_2 \rightarrow 2S$                       | $Q \rightarrow S$             |
| INTB-nat (T30175) | 154                                        | 225                           |
| INTB-H2           | 167                                        | 220                           |
| INTB-H5           | 131                                        | 200                           |
| INTB-H9           | 148                                        | 205                           |
| INTB-H13          | 175                                        | 238                           |
| INTB-H17          | 155                                        | 210                           |
| TT-INTB-nat       | -                                          | 255                           |

<sup>a</sup> Enthalpy changes are reported per mole of monomer.  
Errors on  $\Delta H_{vH}$  is within  $\pm 10\%$ .

**Table S1.** Enthalpy changes obtained from the van't Hoff analysis of the CD melting curves by using different unfolding models.
